# Supplementary material
Source: PubMed Central journal article supplement (PMC3761571)
Supplement: 1301588110_pnas.201301588SI.pdf [file 1301588110_pnas.201301588SI.pdf]

# Supporting Information

Parker et al. 10.1073/pnas.1301588110

## SI Materials and Methods

**RNA Isolation and Real-Time Quantitative PCR.** Total cellular RNA was isolated by using TRIzol (15596026; Life Technologies) according to the manufacturer's instructions. RNA quantification and purity were assessed by using a Nanodrop spectrophotometer. One microgram of total RNA was used for cDNA synthesis with qScript cDNA Supermix kit (95048-100; Quanta Biosciences). Real-time quantitative PCR (RT-qPCR) reactions were performed in triplicate on an ABI 7500 Fast Real-time PCR System with SYBR Green PCR master mix (no. 4309155; Applied Biosystems, Life Technologies). Standard curves were run for all primer pairs to ensure high efficiencies ( $>97\%$ ;  $R^2 > 0.98$ ) and a single shoulder-free peak upon melt curve analysis. Primer sequences are provided in Table S1. GAPDH levels were used for normalization. Similar results were obtained with Rpl29 (not tested in macaque) and Eef1A.

**Cell Culture and Transfection. Primary hippocampal cell culture.** Hippocampal neurons were isolated from embryonic day 18 (E18) rat hippocampus. Freshly dissociated primary hippocampal neurons were immediately transfected with siRNA (Invitrogen) or plasmid DNA by using the Amaxa Nucleofector system (Lonza) per manufacturer's protocol (nucleofection program O-003 and Lonza kit VAPG-1003). The following siRNA sequences were used: Invitrogen, AM4620 Silencer FAM-labeled Negative Control 1 siRNA, 5'-AGUACUGCUUACGAUACGGTT-3' and 3'-CCGUAUCGUAAGCAGUACUTT-5'; Invitrogen, 199229 Silencer Prkcz (PKM- $\zeta$  siRNA 1), 5'-CCCUGACAUGAAUACUGAAAtt-3' and 3'-UUCAGUAUUCAGUCAGGGtt-5'; Invitrogen, s130022 Silencer Select Prkcz (PKM- $\zeta$  siRNA 2), 5'-GGUUGUUCUGG-UCAUCGAtt-3' and 3'-UCGAUGACCAGGAACAACCgg-5'.

For immunofluorescence experiments, neurons were cotransfected with pmaxGFP (Lonza) where indicated. Cells were electroporated at a density of  $2.0 \times 10^7$  cells per mL with 10 nM Silencer Select siRNA (Invitrogen) or 100 nM Silencer siRNA (Invitrogen), and 1  $\mu$ g of pmaxGFP. Control or transfected neurons were plated on coverslips or cell culture plates coated with 0.1 mg/mL poly-L-lysine in 95% MEM (Cellgro), 5% (vol/vol) FBS, and 0.6% (wt/vol) D-glucose. Cells were plated at a density of  $\sim 1,500$  cells per  $\text{cm}^2$  for coverslips or  $\sim 26,000$  cells per  $\text{cm}^2$  for RNA and protein analysis. Culture medium was replaced after 2–3 h with maintenance medium composed of Neurobasal medium (Gibco) supplemented with 2% (vol/vol) B-27 (Gibco), penicillin–streptomycin, 2 mM L-glutamine, and 10 mM Hepes buffer (pH 7.2). Half the volume of culture medium was replaced with fresh maintenance medium 24 h after transfection when applicable. Hippocampal neurons were maintained up to 3 d in culture.

**Cell lines.** HEK293 cells were maintained in high-glucose DMEM (Cellgro), 10% (vol/vol) FBS, penicillin–streptomycin, 1 mM sodium pyruvate, 2 mM L-glutamine, nonessential amino acids,

and 10 mM Hepes buffer (pH 7.2). HEK293 cells were transfected by using Lipofectamine 2000 (Invitrogen) following manufacturer's instructions. Stable-transfected cell lines were established by antibiotic selection with 2  $\mu$ g/mL blasticidin.

**Immunofluorescence.** Hippocampal neurons plated on coverslips (12 mm, 1.5 thickness; Fisher Scientific) were fixed in 4% paraformaldehyde (Electron Microscopy Services) for 15 min at room temperature and washed three times for 5 min each in PBS. Coverslips were treated with 50 mM ammonium chloride for 15 min, washed three times for 5 min each in PBS, and incubated for 30 min in 10% horse serum and 0.05% saponin in PBS (blocking solution). Primary antibodies diluted in blocking solution were incubated for 1 h at room temperature. Coverslips were washed three times in PBS plus 0.1% Tween 20, incubated with secondary antibody for 30 min at room temperature, and washed three times with PBS plus 0.1% Tween 20 before mounting onto glass slides with ProLong Gold (P36930; Invitrogen). A  $\chi^2$  test was used to determine significance of phenotypic changes in neuron polarization. A list of primary and secondary antibodies and concentrations used can be found in Table S3.

**Western Blotting and Coimmunoprecipitation.** Proteins were extracted from tissues or neurons in culture by sonication in radioimmunoprecipitation assay buffer (20 mM Tris, pH 7.2, 170 mM NaCl, 1% NaDeoxycholate, 1% Triton X-100, 0.1% SDS, 5 mM EGTA, 5 mM EDTA) supplemented with protease and phosphatase inhibitor (78443; Pierce). Lysates for coimmunoprecipitation were prepared by lysing hippocampal tissue in 10 mM Tris, pH 7.2, 150 mM NaCl, 1% Triton X-100, 5 mM  $\text{MgCl}_2$ , 2 mM EGTA, 6 mM 2-mercaptoethanol, and sonication. Lysates were clarified by centrifugation and precleared by incubating with Protein A agarose beads (Repligen) for 2 h. After removing agarose beads, lysate was incubated with either anti-pan atypical protein kinase C (aPKC) (SC-216; Santa Cruz) or anti-PKM- $\zeta$ /PKC- $\zeta$  (C24E6/no. 9368; Cell Signaling) overnight at 4  $^\circ\text{C}$  and then incubated for 2 h with Protein A beads. For coimmunoprecipitation of tagged overexpressed proteins, lysis was performed by sonication in 25 mM Hepes, pH 7.5, 150 mM NaCl, 0.25% NaDeoxycholate, 1% Nonidet P-40, 10% (vol/vol) glycerol supplemented with protease, and phosphatase inhibitor. Lysates were clarified by centrifugation and incubated for 2 h at 4  $^\circ\text{C}$  with anti-FLAG M2 magnetic beads (M8823; Sigma). Immunoprecipitated complexes were washed three times with lysis buffer, resuspended in 1 $\times$  LDS sample buffer (Invitrogen), and boiled. Samples were analyzed by Western blotting. A list of primary and secondary antibodies and concentrations used can be found in Table S3. Signal was detected by using the Odyssey Imaging System (LI-COR).



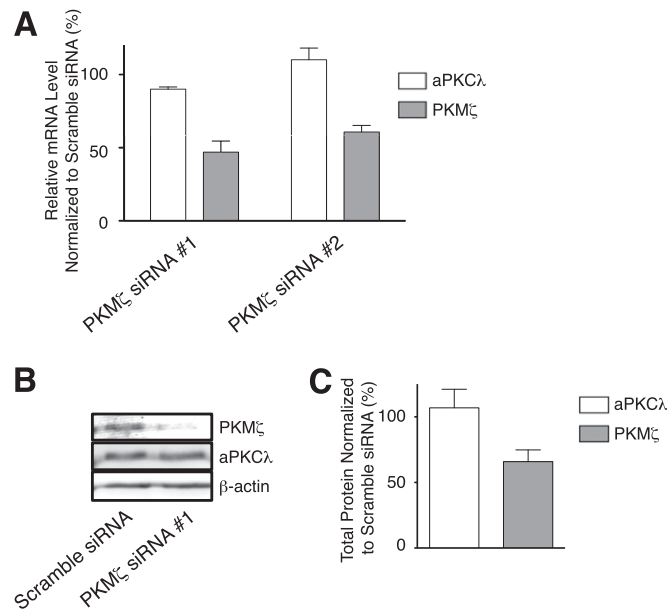

**Fig. S2.** Transfection of neurons with PKM- $\zeta$ -specific siRNA sequences selectively reduces PKM- $\zeta$ , but not aPKC- $\lambda$ , levels. (A) RT-qPCR at day 3 in vitro (DIV3) revealed specific knockdown of PKM- $\zeta$  transcripts by two siRNA sequences (PKM- $\zeta$  mRNA levels  $47.0 \pm 5.4\%$  and  $60.8 \pm 3.2\%$  of scramble control, respectively; mean  $\pm$  SEM of three independent biological replicates). mRNA expression was normalized to GAPDH. Data are presented as mean  $\pm$  SEM of three independent biological replicates. (B and C) Representative Western blot for PKM- $\zeta$  and aPKC- $\lambda$  in cell lysates from hippocampal neurons transfected with scramble or PKM- $\zeta$  siRNA 1 (B) and quantification of signal intensity normalized to  $\beta$ -actin (mean  $\pm$  SEM of three independent biological replicates) (C).

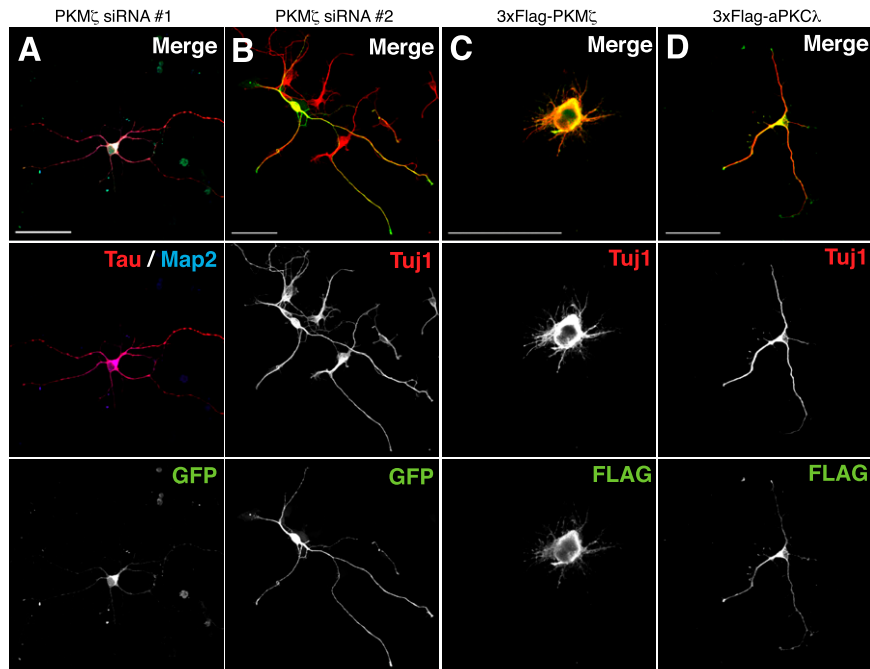

**Fig. S3.** Additional images of transfected neurons fixed and stained on DIV3. (A and B) Neurons treated with PKM- $\zeta$  siRNA and stained for Tau and Map2 (A) or Tuj1 (B) exhibit a multiple axon phenotype. (C and D) Hippocampal neurons overexpressing Flag-tagged PKM- $\zeta$  (C) or aPKC- $\lambda$  (D) were stained for Tuj1 and Flag. (Scale bars: 50  $\mu$ m.)

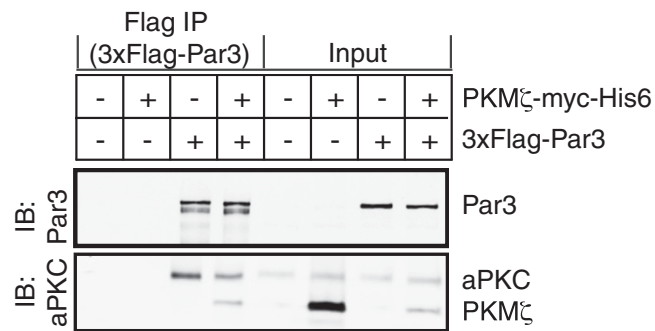

**Fig. S4.** Overexpression of PKM- $\zeta$ -myc-His6 and 3xFlag-Par3 in HEK293 confirms interaction by Flag pull-down and coimmunoprecipitation. PKM- $\zeta$ -myc-His6, 3xFlag-Par3, or both were expressed in HEK293 cells as indicated (+). Flag antibodies were used for immunoprecipitation. Immunoprecipitates were resolved by SDS/PAGE, and immunoblots were probed with Par3 and aPKC antibodies.

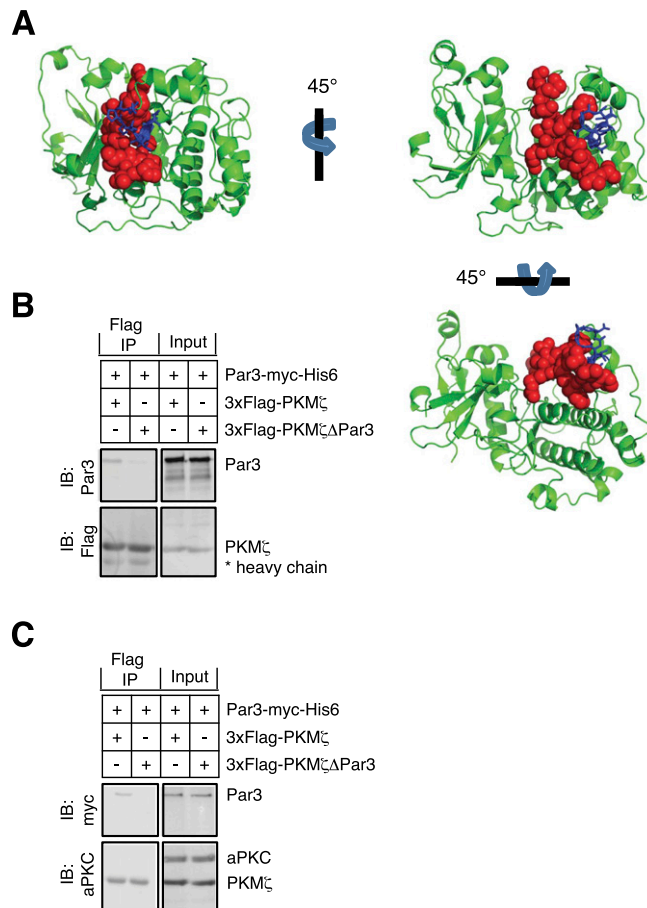

**Fig. S5.** Deletion of predicted Par3-interacting loop in PKM- $\zeta$  disrupts PKM- $\zeta$ -Par3 interaction. (A) I-TASSER predicted structure of PKM- $\zeta$  (green) bound to Par3 (red) based on published structure and interaction of aPKC- $\lambda$  and Par3. Homologous amino acid sequence comprising Par3-interacting loop (IITDNPD) is highlighted in blue. (B and C) (PKM- $\zeta$  $\Delta$ Par3) abolished the ability of this protein to bind Par3 (B and C). Par3-myc-His6 and 3xFlag-PKM- $\zeta$  or PKM- $\zeta$  with IITDNPD deletion (3xFlag-PKM- $\zeta$  $\Delta$ Par3) were expressed in HEK293 cells as indicated (+). Flag antibodies were used for immunoprecipitation. Immunoprecipitates were resolved by SDS/PAGE, and immunoblots were probed with Par3 and Flag or myc and aPKC antibodies as indicated.

**Table S1. RT-qPCR primers**

| Gene            | Sequence                                       |
|-----------------|------------------------------------------------|
| <b>Rat</b>      |                                                |
| GAPDH           | AGGTCGGTGTGAACGGATTTG<br>GGGGTCGTTGATGGCAACA   |
| Eef1A           | TGCCAATTTCTGGTTGGAATG<br>GGGTGACTTCCATCCCTTGA  |
| Rpl29           | CAAGTCCAAGAACCACACCAC<br>GCAAAGCGCATGTTCCCTCAG |
| aPKC- $\lambda$ | TGAGCAGCCATTCACCATGA<br>GGGAACACGTGGATCAGGAG   |
| aPKC- $\zeta$   | GTCAGGGCAGGGACGAAGT<br>GGCGGTAGATGGACTTGTCTTCT |
| PKM- $\zeta$    | GCTCCTTAAAGGGACGGAAGAT<br>GGCTCCACGGCGGTAGAT   |
| <b>Macaque</b>  |                                                |
| GAPDH           | TGCACCACCAACTGCTTAGC<br>GGCGTGGACTGTGGTCATGAG  |
| Eef1A           | TCGGGCAAGTCCACCCTAC<br>CCAAGACCCAGGCATACTTGA   |
| aPKC- $\lambda$ | GGGATGCCTGTCCAGGAG<br>GCTTGGCTTGGAAAGTGTGG     |
| aPKC- $\zeta$   | CTGCCGTGCCAGGAGAA<br>AAGCGCTTGGCTTGGGAAGA      |
| PKM- $\zeta$    | GCTGAGGAGGCAGGAGAAGA<br>CGCTTGGCTTGGAAAGAGAT   |

**Table S2. List of Plasmids used**

| Plasmid                                                                    | Backbone                      |
|----------------------------------------------------------------------------|-------------------------------|
| Par3(712-837)-GAL4AD                                                       | pGAD-GH (Clontech)            |
| Par3(813-837)-GAL4AD                                                       | pGAD-GH (Clontech)            |
| Par3(2-710)-GAL4AD                                                         | pGAD-GH (Clontech)            |
| empty-DBD                                                                  | pGBT9 (Clontech)              |
| PKM $\zeta$ -GAL4DBD                                                       | pGBT9 (Clontech)              |
| PKM $\zeta$ -myc-His6                                                      | pcDNA6-myc-His A (Invitrogen) |
| PKM $\zeta$ $\Delta$ IITDNPD-myc-His6 (PKM $\zeta$ $\Delta$ Par3-myc-His6) | pcDNA6-myc-His A (Invitrogen) |
| Par3-myc-His6                                                              | pcDNA6-myc-His A (Invitrogen) |
| 3xFlag-PKM $\zeta$                                                         | pFLAG3x                       |
| 3xFlag-PKM $\zeta$ (siRNA-resistant)                                       | pFLAG3x                       |
| 3xFlag-PKM $\zeta$ $\Delta$ IITDNPD (3xFlag-PKM $\zeta$ $\Delta$ Par3)     | pFLAG3x                       |
| 3xFlag-aPKC $\lambda$                                                      | pFLAG3x                       |
| 3xFlag-Par3                                                                | pFLAG3x                       |
| PKM $\zeta$ -HA                                                            | pcDNA3 (Invitrogen)           |
| aPKC $\lambda$                                                             | pcDNA3 (Invitrogen)           |
| GFP                                                                        | pEGFP-C2 (Clontech)           |
| aPKC $\lambda$ -GFP                                                        | pEGFP-C2 (Clontech)           |
| aPKC $\zeta$ -GFP                                                          | pEGFP-C2 (Clontech)           |

**Table S3. Antibodies and concentrations**

| Target                      | Antibody no. | Host species | Source         | Use                     |
|-----------------------------|--------------|--------------|----------------|-------------------------|
| pan-aPKC                    | SC-216       | Rabbit       | Santa Cruz     | W (1:1,000), IP         |
| pan-aPKC                    | SC-17781     | Mouse        | Santa Cruz     | W (1:100), IF (1:50)    |
| aPKC- $\lambda$             | SC-11399     | Rabbit       | Santa Cruz     | W (1:250), IF (1:200)   |
| aPKC- $\zeta$ /PKM- $\zeta$ | C24E6/9368   | Rabbit       | Cell Signaling | IP                      |
| Par3                        | SC-98509     | Rabbit       | Santa Cruz     | W (1:500)               |
| Par3                        | 07-330       | Rabbit       | Millipore      | W (1:1,000), IF (1:200) |
| Tuj1                        | mab5544      | Mouse        | Millipore      | IF (1:1,000)            |
| Tuj1                        | 5568P        | Rabbit       | Cell Signaling | IF (1:100)              |
| Tau                         | mab3420      | Mouse        | Millipore      | IF (1:750)              |
| Map2                        | AB5622       | Rabbit       | Chemicon       | IF (1:1,000)            |
| FLAGM2                      | F1804        | Mouse        | Sigma          | W (1:1,000), IF (1:100) |
| Beta-actin                  | A1978        | Mouse        | Sigma          | W (1:2,000)             |
| Anti-mouse IR680            | 926-32222    | Donkey       | LI-COR         | 2°W (1:15,000)          |
| Anti-mouse IR800            | 926-32212    | Donkey       | LI-COR         | 2°W (1:15,000)          |
| Anti-rabbit IR680           | 926-32223    | Donkey       | LI-COR         | 2°W (1:15,000)          |
| Anti-rabbit IR800           | 926-32213    | Donkey       | LI-COR         | 2°W (1:15,000)          |
| Anti-mouse Alexa Fluor 350  | A11045       | Goat         | Invitrogen     | 2°IF (1:1,000)          |
| Anti-mouse Alexa Fluor 568  | A10037       | Donkey       | Invitrogen     | 2°IF (1:1,000)          |
| Anti-rabbit Alexa Fluor 405 | A31556       | Goat         | Invitrogen     | 2°IF (1:1,000)          |
| Anti-rabbit Alexa Fluor 647 | A31573       | Donkey       | Invitrogen     | 2°IF (1:1,000)          |

IF, immunofluorescence; IP, immunoprecipitation; W, Western blot.
